# Supplementary material
Source: PubMed Central journal article supplement (PMC6825838)

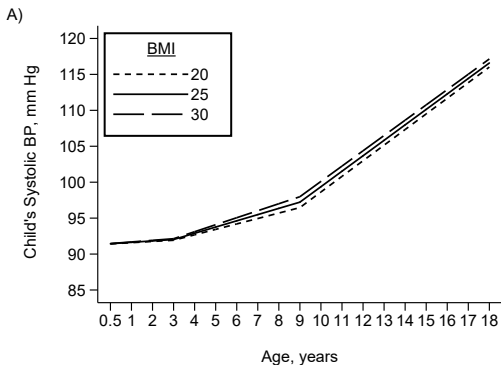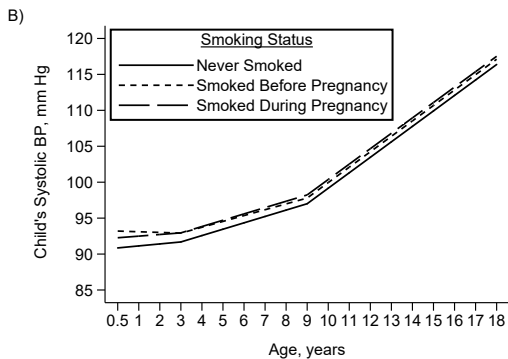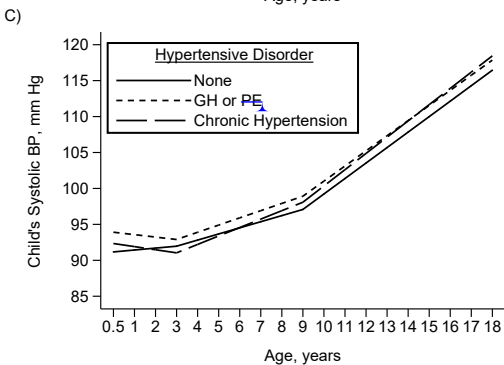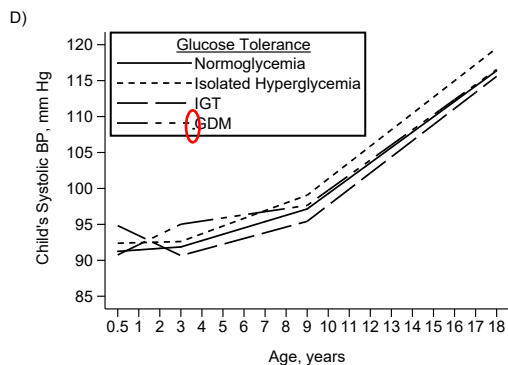

Supplement: kwz181_aris_figure_1_corrections.pdf [file kwz181_aris_figure_1_corrections.pdf]

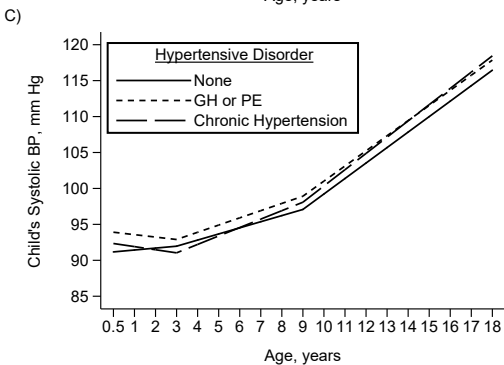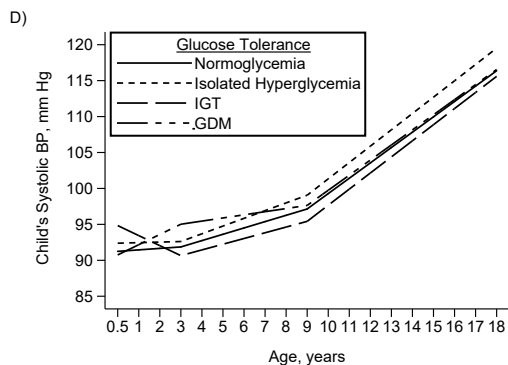

Supplement: kwz181_aris_figure_1_edt.pdf [file kwz181_aris_figure_1_edt.pdf]

A)

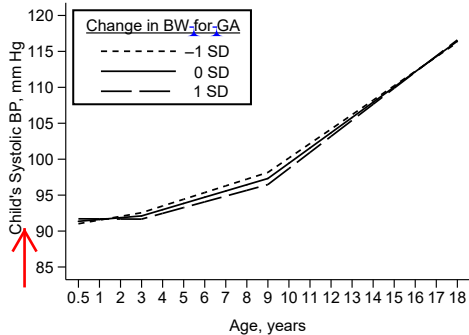

B)

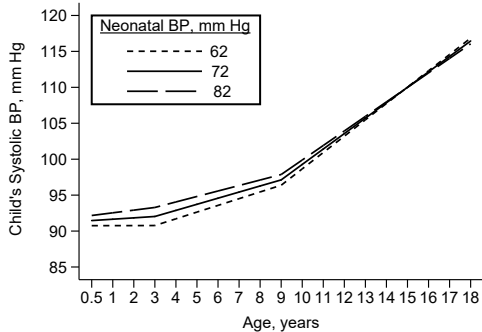

C)

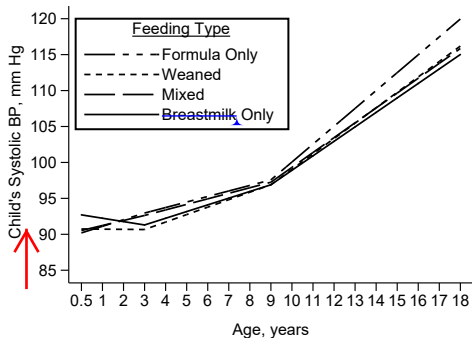

D)

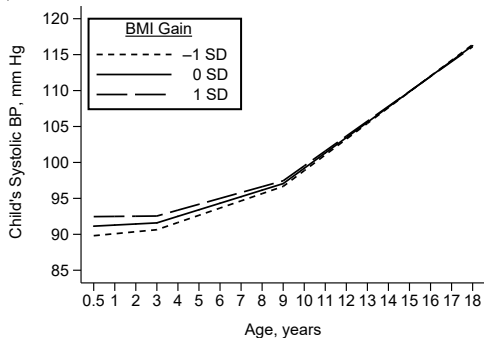

Supplement: kwz181_aris_figure_2_corrections.pdf [file kwz181_aris_figure_2_corrections.pdf]

A)

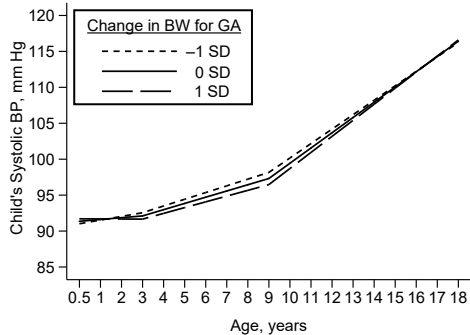

B)

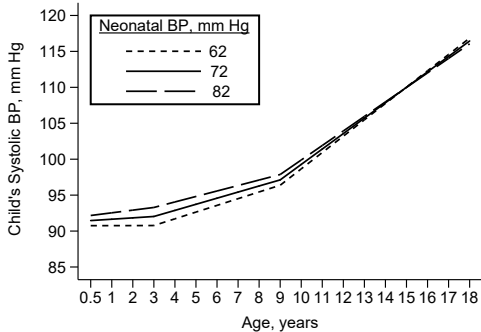

C)

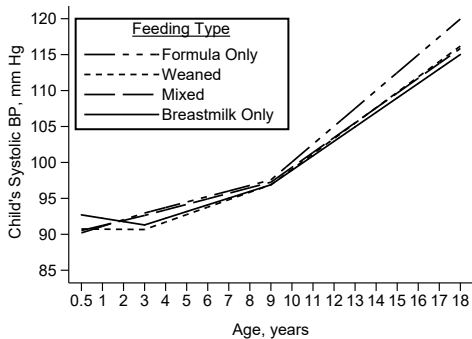

D)

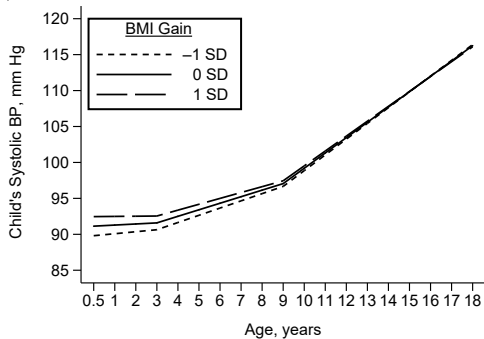

Supplement: kwz181_aris_figure_2_edt.pdf [file kwz181_aris_figure_2_edt.pdf]
